# Supplementary material
Source: PubMed Central journal article supplement (PMC2626611)
Supplement: NIHMS81664-supplement-Table_S1.pdf [file NIHMS81664-supplement-Table_S1.pdf]

**Supplementary Table S1.** Potential hydrogen bonds formed by polar side chains, including solvent waters.<sup>†</sup>

| Side Chain | Active-site ligand-bound                                                                                                                                                        | Active-site ligand-free                                                                                                                                                                |
|------------|---------------------------------------------------------------------------------------------------------------------------------------------------------------------------------|----------------------------------------------------------------------------------------------------------------------------------------------------------------------------------------|
| Arg 286    | Arg 286 Nη1 : Glu 390 Oε1<br>Arg 286 Nη1 : Ser 333 O<br>Arg 286 Nη2 : Glu 390 Oε1<br>Arg 286 Nη2 : H <sub>2</sub> O<br>Arg 286 Nε : H <sub>2</sub> O                            | Arg 286 Nη1 : H <sub>2</sub> O                                                                                                                                                         |
| Ser 332    | Ser 332 Oγ : Ser 339 Oγ<br>Ser 332 Oγ : Ala 284 O<br>Ser 332 Oγ : Ala 284 N<br>Ser 332 Oγ : Ile 282 O<br>Ser 332 Oγ : H <sub>2</sub> O                                          | Ser 332 Oγ : Ser 332 O                                                                                                                                                                 |
| Ser 333    | Ser 333 Oγ : Ser 339 Oγ<br>Ser 333 Oγ : Asn 337 O<br>Ser 333 Oγ : Val 338 O                                                                                                     | No intramolecular contacts                                                                                                                                                             |
| Thr 334    | Thr 334 Oγ1 : Asn 337 Oδ1<br>Thr 334 Oγ1 : Thr 334 O<br>Thr 334 Oγ1 : H <sub>2</sub> O<br>Thr 334 Oγ1 : H <sub>2</sub> O                                                        | No intramolecular contacts                                                                                                                                                             |
| Asp 336    | Asp 336 Oδ1 : Arg 240 Nη1<br>Asp 336 Oδ1 : Asp 336 N<br><br>Asp 336 Oδ2 : Arg 240 Nη1<br>Asp 336 Oδ2 : H <sub>2</sub> O<br>Asp 336 Oδ2 : H <sub>2</sub> O                       | Asp 336 Oδ1 : Asp 336 O<br>Asp 336 Oδ1 : Arg 383 Nη1<br>Asp 336 Oδ1 : H <sub>2</sub> O<br>Asp 336 Oδ1 : H <sub>2</sub> O<br>Asp 336 Oδ2 : Arg383 Nη1<br>Asp 336 Oδ2 : H <sub>2</sub> O |
| Asn 337    | *Asn 337 Oδ1 : Thr 334 Oγ1<br>Asn 337 Oδ1 : Pro 335 O<br>Asn 337 Oδ1 : H <sub>2</sub> O<br>Asn 337 Nδ2 : Asn 337 N<br>Asn 337 Nδ2 : Gly 291 N<br>Asn 337 Nδ2 : H <sub>2</sub> O | Asn 337 Oδ1 : Asn 337 N<br>Asn 337 Oδ1 : H <sub>2</sub> O<br><br>Asn 337 Nδ2 : Asn 337 O<br>Asn 337 Nδ2 : Asn 337 N                                                                    |
| Ser 339    | *Ser 339 Oγ : Ser 333 Oγ<br>*Ser 339 Oγ : Ser 332 Oγ<br>Ser 339 Oγ : Ala 284 O                                                                                                  | Ser 339 Oγ : Arg 341 O<br>Ser 339 Oγ : Trp 340 N                                                                                                                                       |
| Thr 388    | Thr 388 Oγ1 : Ser 333 O                                                                                                                                                         | Thr 388 Oγ1 : Glu 390 Oε1                                                                                                                                                              |

|                               |                                                                                                                                                                |                                                                                                                           |
|-------------------------------|----------------------------------------------------------------------------------------------------------------------------------------------------------------|---------------------------------------------------------------------------------------------------------------------------|
|                               | Thr 388 Oy1 : Met 386                                                                                                                                          | Thr 388 Oy1 : Thr 388 O                                                                                                   |
| Glu 390                       | *Glu 390 Oε1 : Arg 286 Nη1<br>*Glu 390 Oε1 : Arg 286 Nη2<br>Glu 390 Oε1 : H <sub>2</sub> O<br>Glu 390 Oε2 : H <sub>2</sub> O<br>Glu 390 Oε2 : H <sub>2</sub> O | *Glu 390 Oε1 : Thr 388 Oy1<br>Glu 390 Oε1 : H <sub>2</sub> O<br>Glu 390 Oε1 : H <sub>2</sub> O<br>Glu 390 Oε2 : Arg 391 N |
| <hr/>                         |                                                                                                                                                                |                                                                                                                           |
| Total # of unique<br>H-bonds: | 33                                                                                                                                                             | 19                                                                                                                        |

†Potential H-bonds based on PDB ID code 2HBQ for active-site ligand-bound structure and PDB ID code 1SC1 for active-site ligand-free structure.

\*Indicates potential hydrogen bond listed earlier in this table under interacting partner.
