# Supplementary material
Source: PubMed Central journal article supplement (PMC2626611)
Supplement: NIHMS81664-supplement-Table_S2.pdf [file NIHMS81664-supplement-Table_S2.pdf]

**Supplementary Table S2.** Solvent accessibility calculations for salt bridge residues.<sup>†</sup>**Table S2a.** Total solvent exposed surface area for a single salt bridge at position 286 and 390 for caspase-1 variants (units in Å<sup>2</sup>).

| Construct   | Total | Polar | Hydrophobic |
|-------------|-------|-------|-------------|
| Wild type   | 17.2  | 12.8  | 4.4         |
| R286K       | 18.9  | 4.8   | 14.1        |
| E390E       | 18.1  | 11.6  | 6.5         |
| R286K/E390D | 17.3  | 7.7   | 9.6         |

**Table S2a.** Solvent exposed surface area for individual atoms for side chain residues at position 286 and 390 for caspase-1 variants (units in Å<sup>2</sup>, only atoms with accessible surface area are shown).

| Wild type            | R286K                | E390D              | R286K/E390D        |
|----------------------|----------------------|--------------------|--------------------|
| Arg286               | Lys286               | Arg286             | Lys286             |
| C $\gamma$ – 2.7     | C $\gamma$ – 2.2     | C $\gamma$ – 2.9   | C $\gamma$ – 2.6   |
| C $\delta$ – 0.0     | C $\delta$ – 0.0     | C $\delta$ – 0.2   | C $\delta$ – 1.3   |
| N $\epsilon$ – 2.7   | C $\epsilon$ – 7.6   | N $\epsilon$ – 2.7 | C $\epsilon$ – 0.4 |
| N $\eta$ 2 – 7.3     | N $\zeta$ – 0.2      | N $\eta$ 2 – 8.9   | N $\zeta$ – 5.6    |
| Glu390               | Glu390               | Asp390             | Asp390             |
| C $\beta$ – 0.7      | C $\beta$ – 0.8      | C $\beta$ – 2.4    | C $\beta$ – 4.1    |
| C $\gamma$ – 0.0     | C $\gamma$ – 0.3     | C $\gamma$ – 1.0   | C $\gamma$ – 1.2   |
| C $\delta$ – 1.0     | C $\delta$ – 3.4     |                    |                    |
| O $\epsilon$ 2 – 2.8 | O $\epsilon$ 2 – 4.6 | O $\delta$ 2 – 0.0 | O $\delta$ 2 – 2.1 |

<sup>†</sup>These calculations were done using the WHATIF Web Interface based on the following structures: wild type – 2HBQ, R286K – 2H4Y, E390D – 2H4W, R286K/E390D – 2H51.
